# Supplementary material for: A Framework for Including Family Health Spillovers in Economic Evaluation
Source: PubMed Central journal article supplement (PMC4708618; doi:10.1177/0272989x15605094), 2016-02
Supplement: DS_10.11770272989X15605094.pdf [file DS_10.11770272989X15605094.pdf]

## Appendix: Regression models of current health status of patients (model 1) and carers (model 2) in the context of meningitis after after-effects

| Variables                    | MODEL 1                                                   | MODEL 2                                                 |
|------------------------------|-----------------------------------------------------------|---------------------------------------------------------|
|                              | Patient health status<br>regression coefficients (95% CI) | Carer health status<br>regression coefficients (95% CI) |
| <b>After effects</b>         |                                                           |                                                         |
| Behavioural problems         | -0.11 (-0.14 to -0.08)***                                 | -0.03 (-0.05 to -0.01)**                                |
| Learning disability (mild)   | -0.04 (-0.07 to -0.01)**                                  | -0.02 (-0.05 to 0.00)                                   |
| Learning disability (severe) | -0.22 (-0.34 to -0.09)***                                 | -0.08 (-0.16 to 0.01)                                   |
| Speech/language              | -0.05 (-0.09 to 0.00)*                                    | -0.02 (-0.05 to 0.02)                                   |
| Hearing loss (one ear)       | -0.02 (-0.05 to 0.02)                                     | 0.01 (-0.02 to 0.04)                                    |
| Hearing loss (both ears)     | -0.06 (-0.10 to -0.02)**                                  | -0.01 (-0.04 to 0.03)                                   |
| Sight loss                   | -0.02 (-0.08 to 0.05)                                     | -0.03 (-0.09 to 0.03)                                   |
| Other visual impairment      | -0.03 (-0.09 to 0.02)                                     | -0.02 (-0.06 to 0.02)                                   |
| Seizures                     | -0.06 (-0.14 to 0.01)                                     | -0.03 (-0.09 to 0.03)                                   |
| Hydrocephalus                | -0.08 (-0.19 to 0.03)                                     | 0.05 (-0.02 to 0.12)                                    |
| Hypotonia                    | -0.13 (-0.20 to -0.05)**                                  | -0.04 (-0.09 to 0.01)                                   |
| Motor limitations            | -0.19 (-0.28 to -0.09)***                                 | 0.01 (-0.06 to 0.08)                                    |
| Incontinence                 | -0.18 (-0.28 to -0.08)***                                 | 0.02 (-0.02 to 0.06)                                    |
| Balance problems             | -0.05 (-0.09 to -0.01)*                                   | -0.02 (-0.06 to 0.01)                                   |
| Pain (after medication)      | -0.12 (-0.18 to -0.06)***                                 | -0.05 (-0.09 to -0.01)**                                |
| Amputation(s)                | -0.23 (-0.30 to -0.15)***                                 | -0.01 (-0.05 to 0.04)                                   |
| Scarring or tissue damage    | -0.02 (-0.05 to 0.01)                                     | -0.02 (-0.05 to 0.01)                                   |
| Abnormal bone growth         | -0.08 (-0.14 to -0.01)*                                   | 0.01 (-0.03 to 0.05)                                    |
| Arthritis/severe joint pain  | -0.08 (-0.12 to -0.03)**                                  | -0.04 (-0.07 to 0.00)                                   |
| Kidney damage                | -0.01 (-0.08 to 0.05)                                     | -0.01 (-0.07 to 0.05)                                   |
| Other                        | -0.06 (-0.09 to -0.03)***                                 | -0.02 (-0.05 to 0.00)                                   |
| <b>Control variables</b>     |                                                           |                                                         |
| Time since infection (yrs)   | 0.002 (0.000 to 0.004)*                                   | -0.001 (-0.002 to 0.001)                                |
| Survivor age (yrs)           | -0.003 (-0.004 to -0.002)***                              | Not included                                            |
| Network member age (yrs)     | Not included                                              | -0.003 (-0.004 to -0.002)***                            |
| Survivor sex (male)          | 0.031 (0.007 to 0.055)*                                   | Not included                                            |
| Network member sex (male)    | Not included                                              | 0.027 (0.004 to 0.051)*                                 |
|                              | R <sup>2</sup> = 0.646                                    | R <sup>2</sup> = 0.141                                  |
|                              | n=936                                                     | n=936                                                   |

\* p&lt;0.05, \*\*p&lt;0.01, \*\*\*p&lt;0.001
